# Supplementary material for: Delta-Aminolevulinic Acid Dehydratase Enzyme Activity and Susceptibility to Lead Toxicity in Uganda’s Urban Children
Source: Preprints.org preprint supplement (doi:10.20944/preprints202112.0371.v1), 2021-12-22
Supplement: Supplementary file 1 [file supplementary]

Blank Consent form

**Parental Consent to Participate in a Research Study**

**College of Natural Sciences ● Makerere University, Uganda**

| **Title of Study:** | | Role of blood lead during the anemia pathogenesis among Katanga children aged under five years with *Plasmodium* parasite infection | | | | | |
| --- | --- | --- | --- | --- | --- | --- | --- |
| **Investigators:** | | | | | | | |
| **Name:** | **Mukisa Ambrose** | | | **Dept:** | Biochemistry | **Phone:** | 0790222111 |
| **Name:** | **Dr. Kyambadde Joseph** | | | **Dept:** | Biochemistry | **Phone:** | O772510824 |
| **Name:** | **Dr. Denis Kasozi** | | | **Dept:** | Biochemistry | **Phone:** | 0785939611 |
| **Parent/Guardian Name:** | | |  | | | | |

**Sample;** Blood

**Introduction**

- Your child is being asked to be in a research study on the *Role of blood lead on anemia pathogenesis in children with malaria* She /he was selected as a possible participant because *she/he has malaria infection and is the resident of lead polluted area*
- We ask that you read this form and ask any questions that you may have before allowing your child to participate in this study.

**Purpose of Study**

- The purpose of the study is to *investigate the interaction between blood lead levels and Plasmodium parasite infection during anemia pathogenesis in children under five years of age*
- Ultimately, this research may be published in journals

**Description of the Study Procedures**

- If you decide to allow your child to participate in this study, s/he will be asked to do the following things: blood sample provision collected by venipuncture once

**Risks/Discomforts of Being in this Study**

There may be unknown risks.

**Benefits of Being in the Study**

- The benefits of participation are [*explain benefits of participation that will be gained by the participants and/or other. If a benefit is not likely to occur to each participant do not include*.
- [*If there are no expected benefits, state as such.*]

**Confidentiality**

- This study is anonymous. We will not be collecting or retaining any information about your child’s identity.

**Payments**

There won’t be any payments of the participants.

**Right to Refuse or Withdraw**

- The decision to participate in this study is entirely up to you and your child.You are welcome to observe the interview if you wish.Your child may refuse to take part in the study *at any time* without affecting your relationship with the investigators of this study or Smith College or losing benefits to which you are otherwise entitled. Yourchildhas the right not to answer any single question, as well as to withdraw completely from the interview at any point during the process; additionally, you have the right to request that the interviewer not use any of the interview material.

**Right to Ask Questions and Report Concerns**

- You have the right to ask questions about this research study and to have those questions answered by me before, during or after the research. If you have any further questions about the study, at any time feel free to contact me, ***Mukisa Ambrose***] at ***amukisa@cns.mak.ac.ug]***or by telephone at **0790222111**. If you like, a summary of the results of the study will be sent to you.If you have any other concerns about your rights as a research participant that have not been answered by the investigators, you may contact Makerere University Institutional Review Board.
- If you have any problems or concerns that occur as a result of your participation, you can report them to **Dr. Kyambadde Joseph (supervisor**)

**Consent**

- Your signature below indicates that you have decided to allow your child participate as a research subject for this study, and that you have read and understood the information provided above. You will be given a signed and dated copy of this form to keep, along with any other printed materials deemed necessary by the study investigators.

| Parent/Guardian Name: |  |  |  |
| --- | --- | --- | --- |
| Parent/Guardian Signature: |  | Date: |  |
| Investigator’s Signature: |  | Date: |  |
